# Supplementary material for: Uptake, Elimination and Effects of Cosmetic Microbeads on the Freshwater Gastropod Biomphalaria glabrata
Source: MDPI journal article supplement (doi:10.3390/toxics10020087), 2022-02-14
Supplement: s1 [file s1]

# Supplementary Materials: Uptake, Elimination and Effects of Cosmetic Microbeads on the Freshwater Gastropod *Biomphalaria glabrata*

Ying Wang, Alice Baynes, Kofi O. Renner, Mingxing Zhang, Mark D. Scrimshaw and Edwin J. Routledge

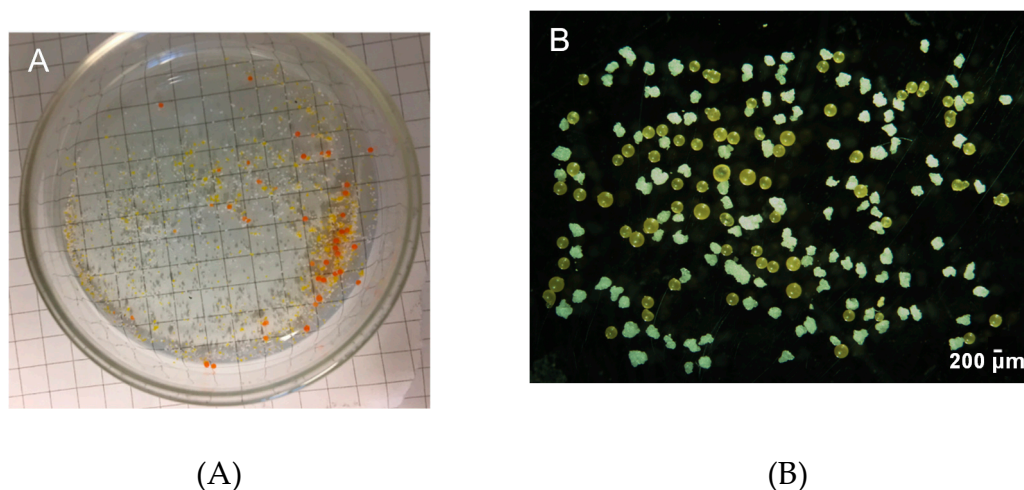

**Figure S1.** Microbeads (A) extracted from facial scrub and those (B) used for bioassays.

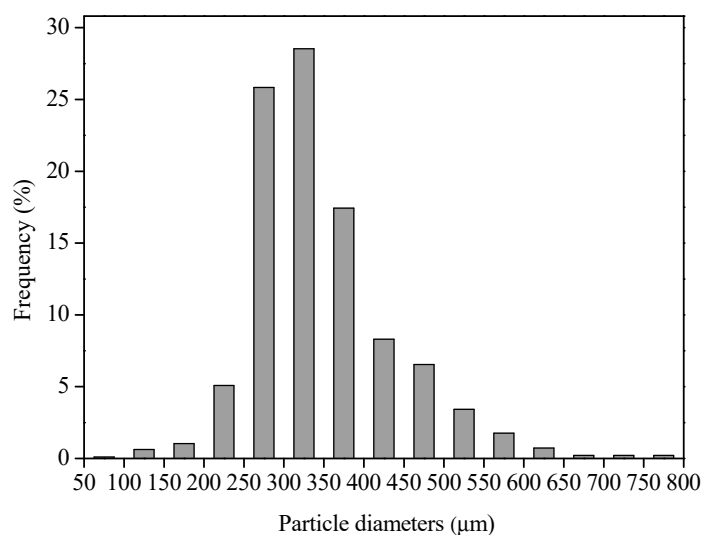

**Figure S2.** Size distribution of microbeads used for bioassays.

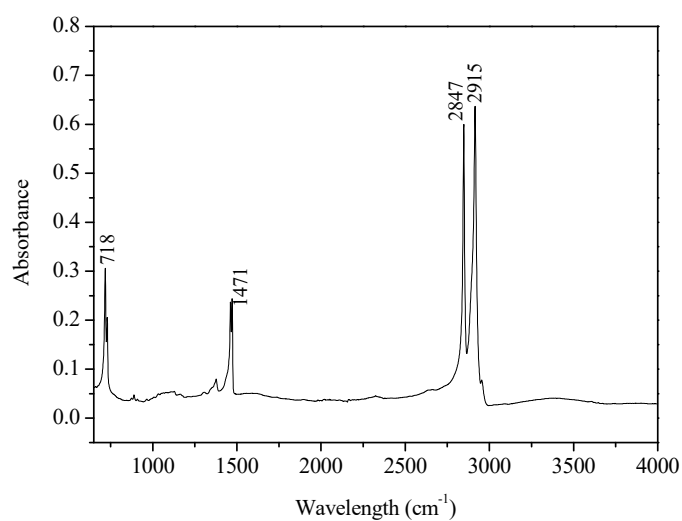

**Figure S3.** Fourier transform infrared (FT-IR) spectrum of the studied microbeads.

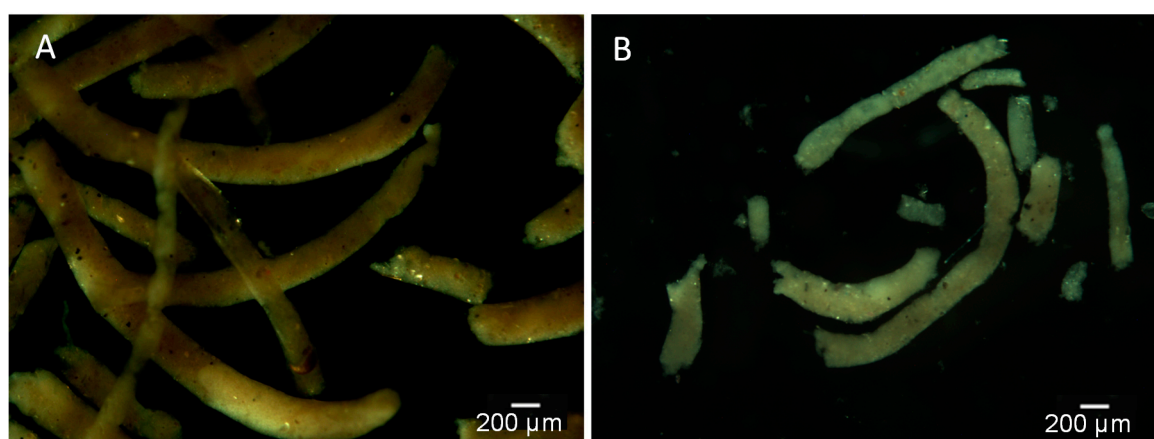

**Figure S4.** Faeces of adult (A) and young (B) *B. glabrata* in control groups over 48-h and 21-d exposures.

**Table S1.** Overview of the experimental design for experiment I-II.

| Experiment          | Content                      | Endpoints or operation      | Test concentrations | Number of animals /replicate/treatment | Replicates | Number of animals in total           |
|---------------------|------------------------------|-----------------------------|---------------------|----------------------------------------|------------|--------------------------------------|
| I Short-term (48 h) | Ingestion and egestion I(a)) | Microplastic quantification | 0, 4 particles/mL   | 5 (4 for Exp. I(a))                    | 6          | 4 × 2 treatments × 6 replicates = 48 |
|                     | Acute toxicity I(b))         | Growth, survival            | (5 mg/L)            |                                        |            | 5 × 2 treatments × 6 replicates = 60 |
| II Long-term (21 d) | Ingestion and egestion II(a) | Microplastic quantification | 0, 0.4 particle/mL  | 5 (4 for Exp. II(a))                   | 6          | 4 × 2 treatments × 6 replicates = 48 |
|                     | Chronic toxicity II(b)       | Growth, survival            | (0.5 mg/L)          |                                        |            | 5 × 2 treatments × 6 replicates = 60 |

**Table S2.** Statistical parameters of size distribution ( $\mu\text{m}$ ) of microbeads in different media for 48-h bioassay.

|                | Fragment |        |                 |          | Sphere |        |                 |          |
|----------------|----------|--------|-----------------|----------|--------|--------|-----------------|----------|
|                | Tissue   | Faeces | Exposure medium | Standard | Tissue | Faeces | Exposure medium | Standard |
| <b>Min</b>     | 195      | 141    | 155             | 171      | 128    | 111    | 86              | 83       |
| <b>Max</b>     | 906      | 816    | 672             | 789      | 629    | 443    | 427             | 442      |
| <b>Average</b> | 415      | 384    | 386             | 371      | 332    | 288    | 288             | 291      |
| <b>SD</b>      | 109      | 103    | 104             | 90       | 66     | 65     | 57              | 52       |
| <b>Number</b>  | 755      | 1102   | 79              | 660      | 351    | 67     | 162             | 304      |

**Table S3.** Statistical parameters of size distribution ( $\mu\text{m}$ ) of microbeads in different media for 21-day bioassay.

|                | Fragments           |                     |          | Spheres             |                     |          |
|----------------|---------------------|---------------------|----------|---------------------|---------------------|----------|
|                | Tissue <sup>a</sup> | Faeces <sup>b</sup> | Standard | Tissue <sup>a</sup> | Faeces <sup>b</sup> | Standard |
| <b>Min</b>     | 194                 | 112                 | 171      | 150                 | 126                 | 83       |
| <b>Max</b>     | 900                 | 842                 | 789      | 558                 | 636                 | 442      |
| <b>Average</b> | 398                 | 386                 | 371      | 279                 | 276                 | 291      |
| <b>SD</b>      | 115                 | 91                  | 90       | 62                  | 72                  | 52       |
| <b>Number</b>  | 163                 | 1106                | 660      | 375                 | 86                  | 304      |

<sup>a</sup> Tissue samples were collected at Day 21.

<sup>b</sup> Faeces samples were collected at Day 2, 4, 6, 8, 16 and 21; here shown is the statistical results for all of the faeces samples.
